# Supplementary material
Source: publisher figshare collection journal article supplement (https://frontiersin.figshare.com/ndownloader/files/30806734)
Supplement: Supplementary file [file 30806734]

# Synthesizing and Evaluating the Photocatalytic and Antibacterial Ability of TiO<sub>2</sub>/SiO<sub>2</sub> Nanocomposite for Silicate Coating

Manh-Cuong Le <sup>1\*</sup>, Thu-Huong Le <sup>2\*</sup>, Thanh-Huyen Bui Thi<sup>1</sup>, Quang-Dat Nguyen<sup>1</sup>, Thanh-Ha Do Thi<sup>1</sup>, Minh-Nguyet Tran Thi<sup>1</sup>

<sup>1</sup>Faculty of Building Material, National University of Civil Engineering, Ha Noi/100000, Viet Nam.

<sup>2</sup>Faculty of Chemistry and Environment, Thuyloi University, Ha Noi/100000, Viet Nam.

\* **Correspondence:** Manh-Cuong Le and Thu-Huong Le  
email: cuonglm@nuce.edu.vn

[lethuhuong@tlu.edu.vn](mailto:lethuhuong@tlu.edu.vn)

## 1. Results and Discussion

The surface morphology and particle size of TiO<sub>2</sub>/SiO<sub>2</sub> Nc (0–50%) were evaluated by SEM (Figure S1). The SEM image clearly shows that the isolated spherical particle of the TiO<sub>2</sub>/SiO<sub>2</sub> Nc (0-50%) samples are formed. Second, when the SiO<sub>2</sub> content in the nanocomposite sample increases from 0 to 15%, the SEM results of four samples TiO<sub>2</sub>/SiO<sub>2</sub> Nc (0-15%) show a the particle size samples decreases slowly. In contrast, the SEM results of two samples TiO<sub>2</sub>/SiO<sub>2</sub> Nc (20-50%) show decreases rapidly. These SEM results are consistent with the XRD results reported above. As the SiO<sub>2</sub> content increases from 0 to 50%, the anatase and rutile grain size decrease. Thus, we suggest that the increased of SiO<sub>2</sub> content in TiO<sub>2</sub>/SiO<sub>2</sub> Nc prevent the crystalline transition to the rutile phase, results in retard the growth of nanoparticles and reduce the anatase grain size from 20.0 to 18.2 nm and rutile grain size from 20.8 to 16.8 nm.

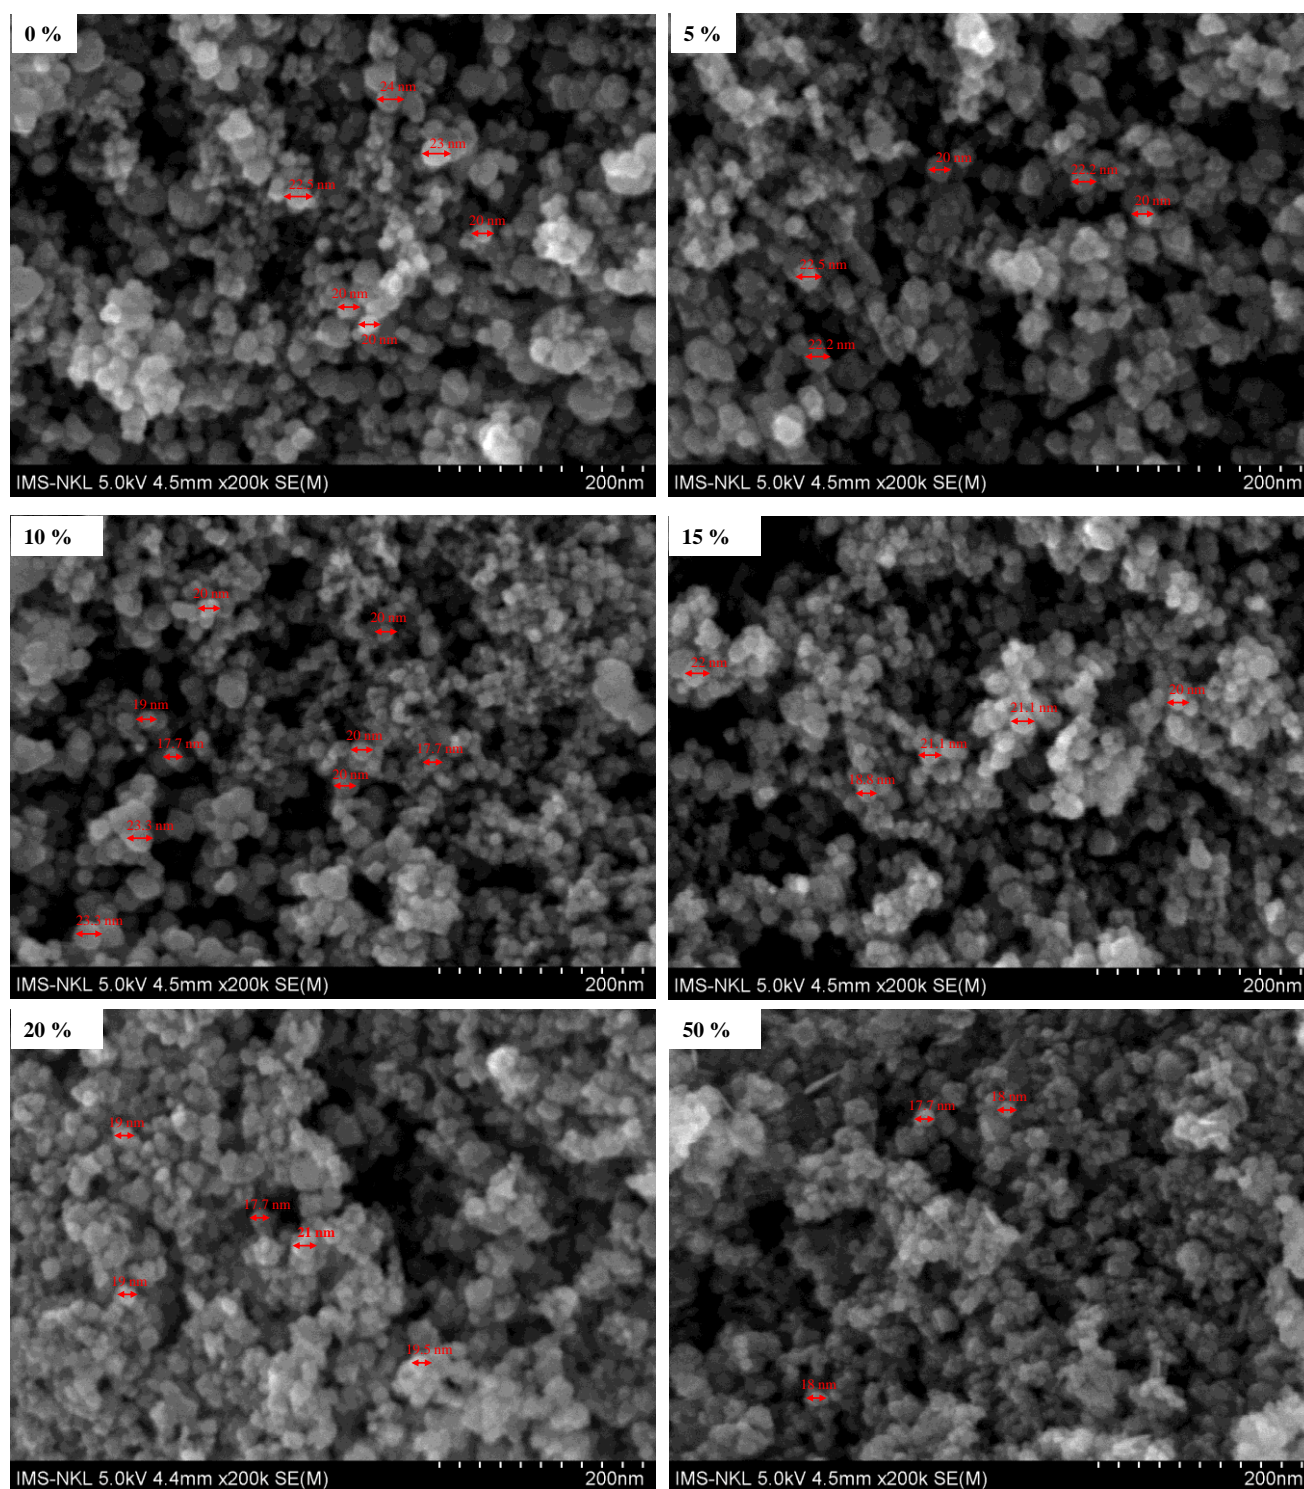

**Figure S1.** SEM images of  $\text{TiO}_2/\text{SiO}_2$  Nc (0-50%) samples.
